# Supplementary material for: The Root Hair Development of Pectin Polygalacturonase PGX2 Activation Tagging Line in Response to Phosphate Deficiency
Source: Frontiers journal article supplement (doi:10.3389/fpls.2022.862171), 2022-05-02
Supplement: Data_Sheet_1.PDF [file Data_Sheet_1.PDF]

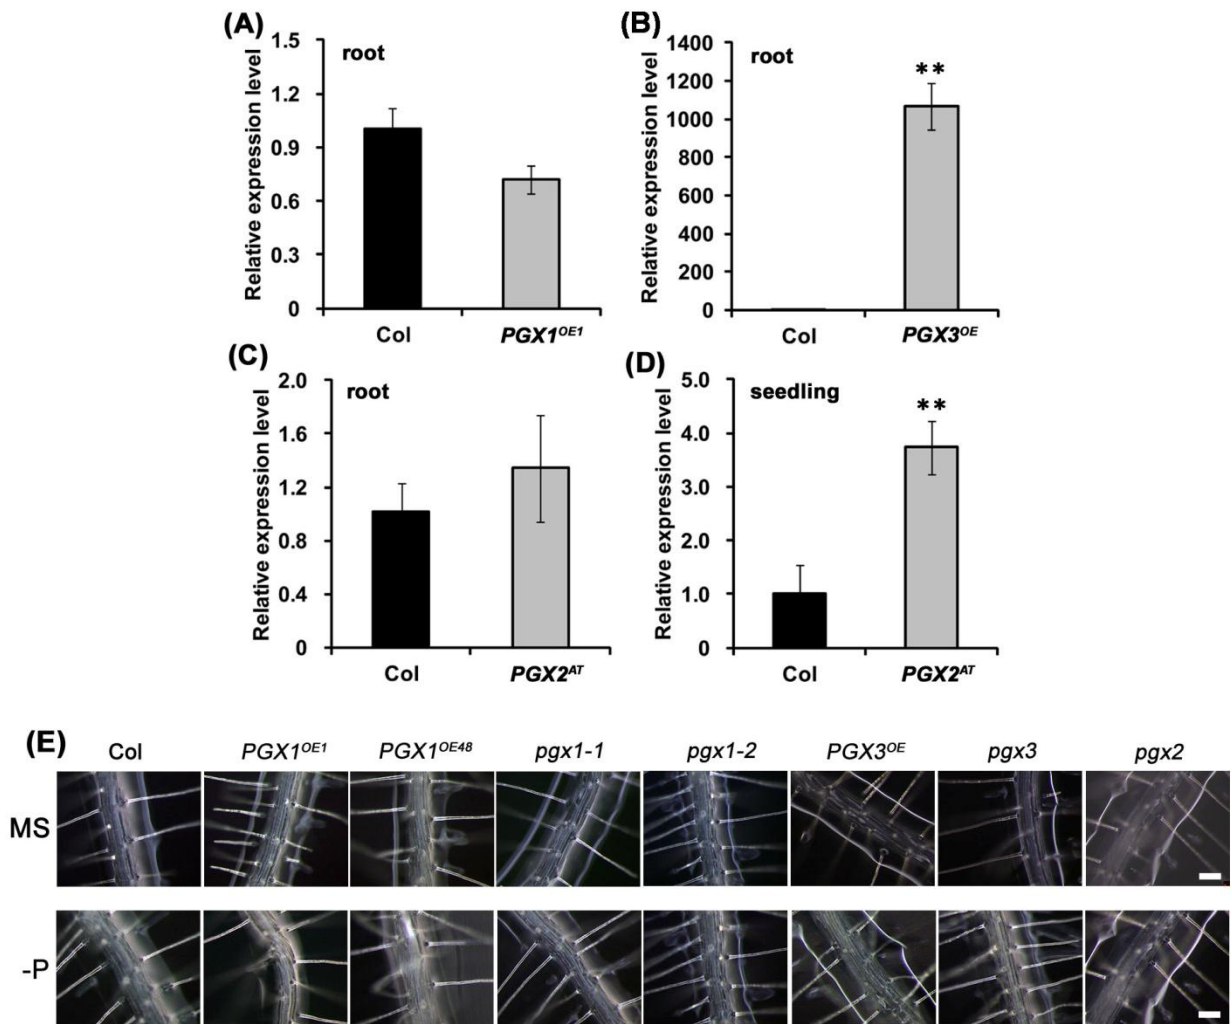

**Supplementary Figure 1.** Gene expression detection and root hairs of Col and PG-related mutants grown under phosphate deficient conditions. **(A-D)** Gene expression detection by qPCR from the roots and seedlings of seven-day-old light-grown Col, *PGX1<sup>OE1</sup>*, *PGX3<sup>OE</sup>*, *PGX2<sup>AT</sup>* plants (n = 3 technical replicates, *t*-test, \*\*P < 0.001). **(E)** Primary roots with root hair region of Col, *PGX1<sup>OE1</sup>*, *PGX1<sup>OE48</sup>*, *pgx1-1*, *pgx1-2*, *PGX3<sup>OE</sup>*, *pgx3* and *pgx2* seedlings grown in normal (MS, 480  $\mu$ M) and phosphate deficient (-P, 10  $\mu$ M) conditions. Images focusing on root hair regions were taken after 3-day-old seedlings were transferred onto normal MS or phosphate deficient medium plates for another four days. Bars = 100  $\mu$ m.

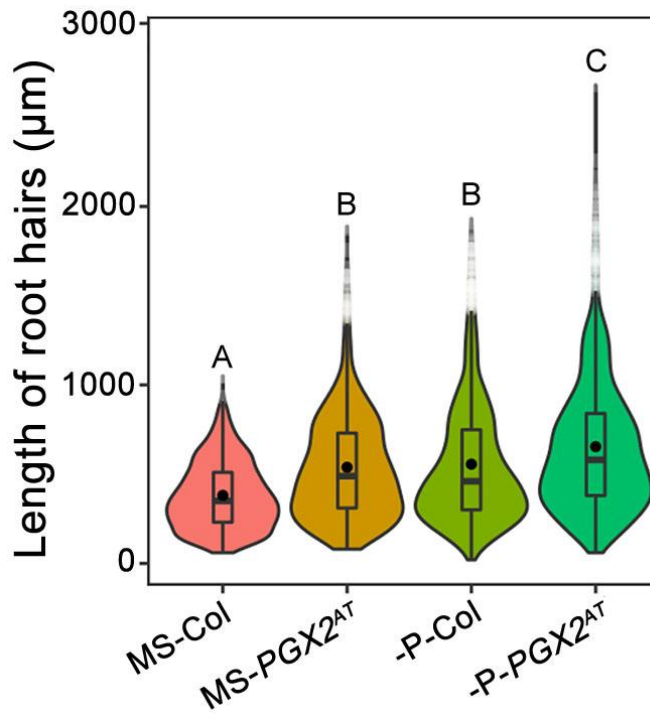

**Supplementary Figure 2.** *PGX2<sup>AT</sup>* seedlings have longer root hairs under normal and phosphate deficient conditions. Violin plot of root hair length of seven-day-old Col and *PGX2<sup>AT</sup>* seedlings under normal and low P conditions ( $n \geq 800$  root hairs from at least 10 seedlings). Uppercase letters indicate significantly different groups as determined by one-way ANOVA with post-hoc Duncan's test ( $P < 0.01$ ).

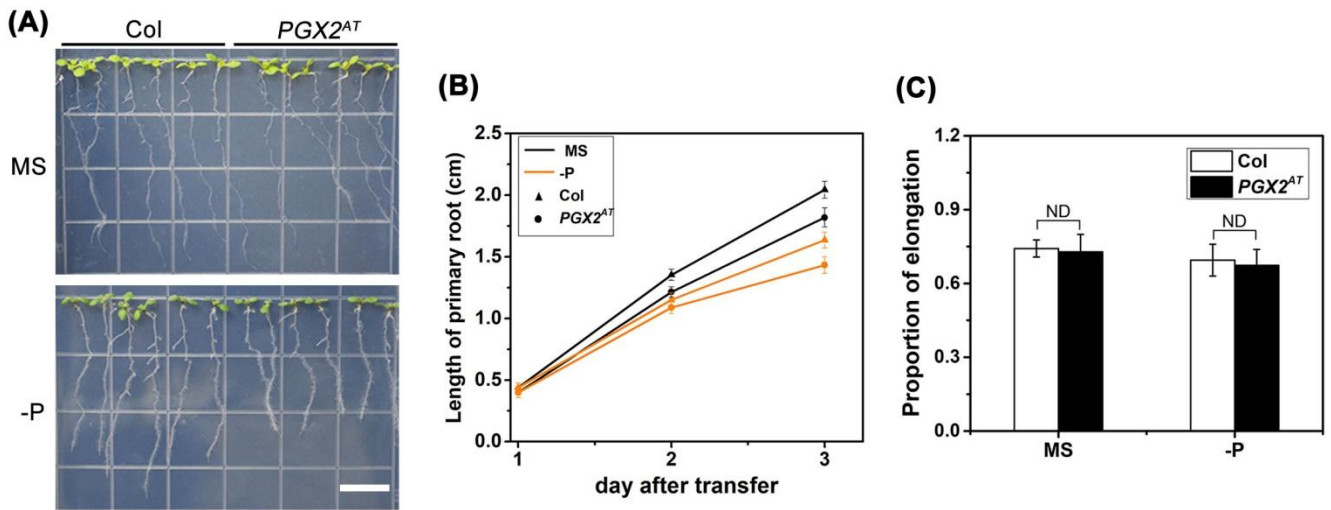

**Supplementary Figure 3.** Primary root length of Col and *PGX2<sup>AT</sup>* seedlings. **(A)** Col and *PGX2<sup>AT</sup>* seedlings grown for three days in normal conditions were transferred onto normal MS or phosphate deficient (-P) MS medium plates for another four days. Bar = 1 cm. **(B)** Primary root lengths of Col and *PGX2<sup>AT</sup>* seedlings after seedlings were transferred to normal MS and -P conditions. **(C)** Proportion of root elongation to total length of Col and *PGX2<sup>AT</sup>* seedlings (n = 35 seedlings per each genotype). Error bars represent SD. ND, no statistical difference.

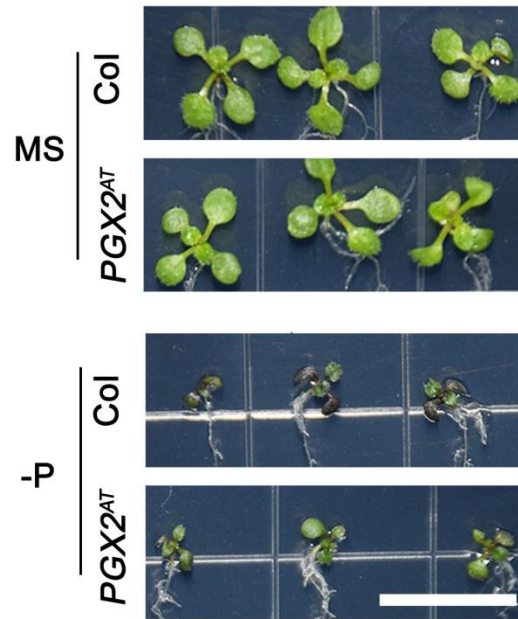

**Supplementary Figure 4.** Anthocyanin accumulation in leaves of Col and *PGX2<sup>AT</sup>* seedlings under low phosphate conditions. *PGX2<sup>AT</sup>* seedlings display less anthocyanin accumulation compared to Col controls against low phosphate treatment. Images were taken in the 10<sup>th</sup> day after seedling transfer. Bar = 1 cm.

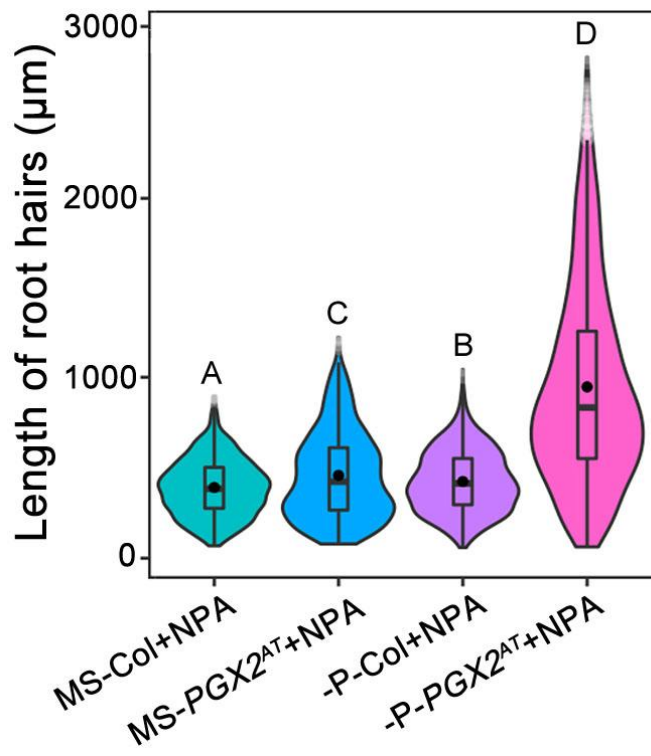

**Supplementary Figure 5.** NPA application promotes root hair elongation of *PGX2<sup>AT</sup>* seedlings in phosphate deficient conditions. Violin plot of root hair length of seven-day-old Col and *PGX2<sup>AT</sup>* seedlings with NPA treatment under normal and low P conditions ( $n \geq 800$  root hairs from at least 10 seedlings). Uppercase letters indicate significantly different groups as determined by one-way ANOVA with post-hoc Duncan's test ( $P < 0.01$ ).

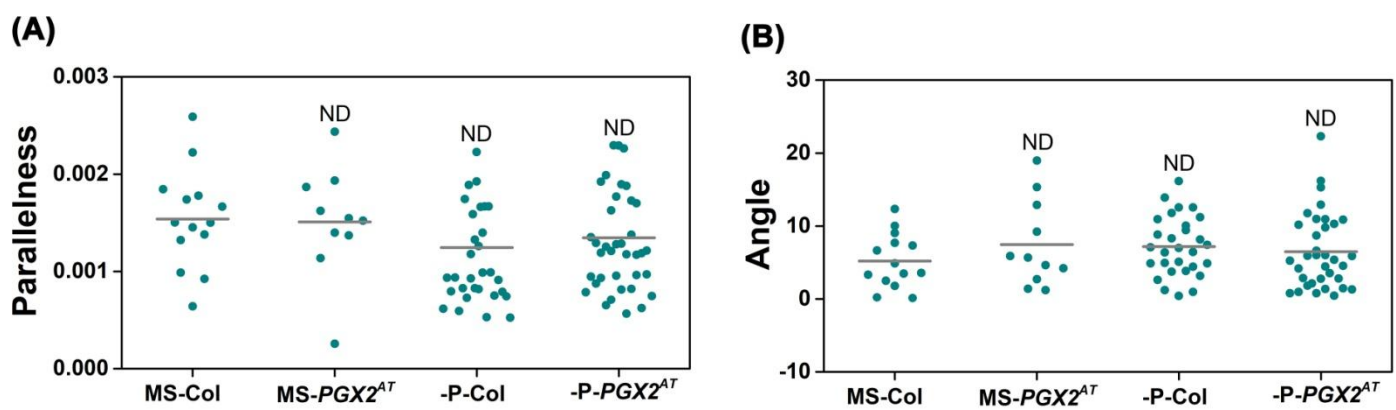

**Supplementary Figure 6.** Actin filament orientation in *Lifeact-GFP* Col and *Lifeact-GFP* *PGX2<sup>AT</sup>* transgenic seedlings under normal MS and phosphate deficient conditions. **(A, B)** Parallelness and angle of actin filaments relative to cell elongation axis ( $n \geq 11$  cells). ND, no statistical difference.
